# Supplementary material
Source: ML conference proceedings conference paper supplement (https://proceedings.neurips.cc/paper_files/paper/2019/hash/04115ec378e476c56d19d827bcf8db56-Abstract.html)
Supplement: Supplementary file [file 04115ec378e476c56d19d827bcf8db56-Supplemental.zip]

## A Appendix - Proofs and Additional Material

### A.1 Section 1

#### A.1.1 Additional Material

**Example A.1** (Without inverse stability: parameter minimum  $\not\Rightarrow$  realization minimum). Consider the two domains

$$D_1 := \{(x_1, x_2) \in (-1, 1)^2 : x_2 > |x_1|\}, \quad D_2 := \{(x_1, x_2) \in (-1, 1)^2 : x_1 > |x_2|\}. \quad (40)$$

For simplicity of presentation, assume we are given two samples  $x^1 \in D_1$ ,  $x^2 \in D_2$  with labels  $y^1 = 0$ ,  $y^2 = 1$ . The corresponding MSE is

$$\mathcal{L}(g) = \frac{1}{2}((g(x^1))^2 + (g(x^2) - 1)^2) \quad (41)$$

for every  $g \in C(\mathbb{R}^2, \mathbb{R})$ . Let the zero realization be parametrized by<sup>5</sup>

$$\Gamma_* = (0, (-1, 0)) \in \mathcal{N}_{(2,1,1)} \quad (42)$$

with loss  $\mathcal{L}(\mathcal{R}(\Gamma_*)) = \frac{1}{2}$ . Note that changing each weight by less than  $\frac{1}{2}$  does not decrease the loss, as this rotates the vector  $(-1, 0)$  by at most  $45^\circ$ . Thus  $\Gamma_*$  is a local minimum in the parametrization space. However, the sequence of realizations given by

$$g_k(x) = \frac{1}{k}\rho(x_1 - x_2) = \mathcal{R}((1, -1), \frac{1}{k}) \quad (43)$$

satisfies that

$$\|g_k - \mathcal{R}(\Gamma_*)\|_{W^{1,\infty}((-1,1)^2)} = \|g_k\|_{W^{1,\infty}((-1,1)^2)} \leq \frac{1}{k} \quad (44)$$

and

$$\mathcal{L}(g_k) = \frac{1}{2}(g_k(x^2) - 1)^2 < \frac{1}{2} = \mathcal{L}(\mathcal{R}(\Gamma_*)), \quad (45)$$

see Figure 6. Accordingly,  $\mathcal{R}(\Gamma_*)$  is not a local minimum in the realization space even w.r.t. the Sobolev norm. The problem occurs, since inverse stability fails due to unbalancedness of  $\Gamma_*$ .

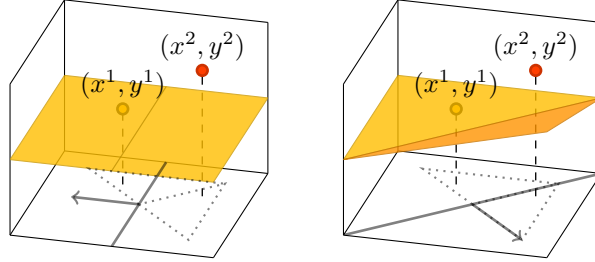

Figure 6: The figure shows the samples  $((x^i, y^i))_{i=1,2}$ , the realization  $\mathcal{R}(\Gamma_*)$  of the local parameter minimum (left) and  $g_3$  (right).

**Theorem A.2** (Quality of local realization minima). Assume that

$$\sup_{f \in S} \inf_{\Phi \in \Omega_N} \|\mathcal{R}(\Phi) - f\| < \eta \quad (\text{approximability}). \quad (46)$$

Let  $g_*$  be a local minimum with radius  $r' \geq 2\eta$  of the optimization problem  $\min_{g \in \mathcal{R}(\Omega_N)} \mathcal{L}(g)$ . Then it holds for every  $g \in \mathcal{R}(\Omega_N)$  (in particular for every global minimizer) that

$$\mathcal{L}(g_*) \leq \mathcal{L}(g) + \frac{2c}{r'} \|g_* - g\| \eta. \quad (47)$$

*Proof.* Define  $\lambda := \frac{r'}{2\|g - g_*\|}$  and  $f := (1 - \lambda)g_* + \lambda g \in S$ . Due to (46) there is  $\Phi \in \Omega_N$  such that  $\|\mathcal{R}(\Phi) - f\| \leq \eta$  and by the assumptions on  $g_*$  and  $\mathcal{L}$  it holds that

$$\mathcal{L}(g_*) \leq \mathcal{L}(\mathcal{R}(\Phi)) \leq \mathcal{L}(f) + c\eta \leq (1 - \lambda)\mathcal{L}(g_*) + \lambda\mathcal{L}(g) + c\eta.$$

This completes the proof. See Figure 7 for illustration.  $\square$

<sup>5</sup>See notation in the beginning of Section 2.



with linearly independent weight vectors  $(a_i^\Theta)_{i=1}^m$  and  $\min_{i \in [m]} \|c_i^\Theta\|_\infty > 0$  and let

$$\Phi = (A^\Phi, B^\Phi) = ([a_1^\Phi | \dots | a_m^\Phi]^T, [c_1^\Phi | \dots | c_m^\Phi]) \in \mathcal{N}_{(d,m,D)} \quad (52)$$

with  $\mathcal{R}(\Phi) = \mathcal{R}(\Theta)$ . Then there exists a permutation  $\pi: [m] \rightarrow [m]$  such that for every  $i \in [m]$  there exist  $\lambda_i \in (0, \infty)$  with

$$a_i^\Phi = \lambda_i a_{\pi(i)}^\Theta \quad \text{and} \quad c_i^\Phi = \frac{1}{\lambda_i} c_{\pi(i)}^\Theta. \quad (53)$$

This means that, up to reordering and rebalancing,  $\Theta$  is the unique parametrization of  $\mathcal{R}(\Theta)$ .

*Proof.* First we define for every  $s \in \{0, 1\}^m$  the corresponding open orthant

$$O^s := \{x \in \mathbb{R}^m : x_1(2s_1 - 1) > 0, \dots, x_m(2s_m - 1) > 0\} \subseteq \mathbb{R}^m. \quad (54)$$

By assumption  $A^\Theta$  has rank  $m$ , i.e. is surjective, and therefore the preimages of the orthants

$$H^s := \{x \in \mathbb{R}^d : A^\Theta x \in O^s\} \subseteq \mathbb{R}^d, \quad s \in \{0, 1\}^m, \quad (55)$$

are disjoint, non-empty open sets. Note that on each  $H^s$  the realization  $\mathcal{R}(\Theta)$  is linear with

$$\mathcal{R}(\Theta)(x) = C^\Theta \text{diag}(s) A^\Theta x \quad \text{and} \quad D\mathcal{R}(\Theta)(x) = C^\Theta \text{diag}(s) A^\Theta. \quad (56)$$

Since  $A^\Theta$  has full row rank, it has a right inverse. Thus we have for  $s, t \in \{0, 1\}^m$  that

$$C^\Theta \text{diag}(s) A^\Theta = C^\Theta \text{diag}(t) A^\Theta \implies C^\Theta \text{diag}(s) = C^\Theta \text{diag}(t). \quad (57)$$

Note that  $C^\Theta \text{diag}(s) = C^\Theta \text{diag}(t)$  can only hold if  $s = t$  due to the assumptions that  $\|c_i^\Theta\|_\infty \neq 0$  for all  $i \in [m]$ . Thus the above establishes that for  $s, t \in \{0, 1\}^m$  it holds that

$$C^\Theta \text{diag}(s) A^\Theta = C^\Theta \text{diag}(t) A^\Theta \quad \text{if and only if} \quad s = t, \quad (58)$$

i.e.  $\mathcal{R}(\Theta)$  has different derivatives on its  $2^m$  linear regions. In order for  $\mathcal{R}(\Phi)$  to have matching linear regions and matching derivatives on each one of them, there must exist a permutation matrix  $P \in \{0, 1\}^{m \times m}$  such that for every  $s \in \{0, 1\}^m$

$$PA^\Phi x \in O^s \quad \text{for every } x \in H^s. \quad (59)$$

Thus, there exist  $(\lambda_i)_{i=1}^m \in (0, \infty)^m$  such that

$$A^\Phi = \text{diag}(\lambda_1, \dots, \lambda_m) P^T A^\Theta. \quad (60)$$

The assumption that  $D\mathcal{R}(\Theta) = D\mathcal{R}(\Psi)$ , together with (56) for  $s = (1, \dots, 1)$ , implies that

$$C^\Phi = C^\Theta P \text{diag}(\frac{1}{\lambda_1}, \dots, \frac{1}{\lambda_m}), \quad (61)$$

which proves the claim.  $\square$

**Example A.4** (Failure due to unbalancedness). *Let*

$$\Gamma_k := ((k, 0), \frac{1}{k^2}) \in \mathcal{N}_{(2,1,1)}, \quad k \in \mathbb{N}, \quad (62)$$

and  $g_k \in \mathcal{R}(\mathcal{N}_{(2,1,1)})$  be given by

$$g_k(x) = \frac{1}{k} \rho(\langle (0, 1), x \rangle), \quad k \in \mathbb{N}. \quad (63)$$

The only way to parametrize  $g_k$  is  $g_k(x) = \mathcal{R}(\Phi_k)(x) = c\rho(\langle (0, a), x \rangle)$  with  $a, c > 0$  (see Lemma A.3), and we have

$$|\mathcal{R}(\Phi_k) - \mathcal{R}(\Gamma_k)|_{W^{1,\infty}} \leq \frac{1}{k} \quad \text{and} \quad \|\Phi_k - \Gamma_k\|_\infty \geq k. \quad (64)$$

**Lemma A.5.** *Let  $d, m \in \mathbb{N}$  and  $a_i \in \mathbb{R}^d$ ,  $i \in [m]$ , such that  $\sum_{i \in [m]} a_i = 0$ . Then it holds for all  $x \in \mathbb{R}^d$  that*

$$\sum_{i \in [m]} \rho(\langle a_i, x \rangle) = \sum_{i \in [m]} \rho(\langle -a_i, x \rangle). \quad (65)$$

*Proof.* By assumption we have for all  $x \in \mathbb{R}^d$  that  $\sum_{i \in [m]} \langle a_i, x \rangle = 0$ . This implies for all  $x \in \mathbb{R}^d$  that

$$\sum_{i \in [m]: \langle a_i, x \rangle \geq 0} \langle a_i, x \rangle - \sum_{i \in [m]} \langle a_i, x \rangle = \sum_{i \in [m]: \langle a_i, x \rangle \leq 0} -\langle a_i, x \rangle, \quad (66)$$

which proves the claim.  $\square$

### A.2.2 Proofs

*Proof of Example 2.1.* We have for every  $k \in \mathbb{N}$  that

$$\|g_k\|_{L^\infty((-1,1)^2)} \leq \frac{1}{k} \quad \text{and} \quad |g_k|_{W^{1,\infty}} = k^2. \quad (67)$$

Assume that there exists sequence of networks  $(\Phi_k)_{k \in \mathbb{N}} \subseteq \mathcal{N}_{(2,2,1)}$  with  $\mathcal{R}(\Phi_k) = g_k$  and with uniformly bounded parameters, i.e.  $\sup_{k \in \mathbb{N}} \|\Phi_k\|_\infty < \infty$ . Note that there exists a constant  $C$  (depending only on the network architecture) such that the realizations  $\mathcal{R}(\Phi_k)$  are Lipschitz continuous with

$$\text{Lip}(\mathcal{R}(\Phi_k)) \leq C \|\Phi_k\|_\infty^2$$

(see [34, Prop. 5.1]). It follows that  $|\mathcal{R}(\Phi_k)|_{W^{1,\infty}} \leq \text{Lip}(\mathcal{R}(\Phi_k))$  is uniformly bounded which contradicts (67).  $\square$

*Proof of Example 2.2.* The only way to parametrize  $g_k$  is  $g_k(x) = \mathcal{R}(\Phi_k)(x) = c\rho(\langle(0, a), x\rangle)$  with  $a, c > 0$  (see also Lemma A.3), which proves the claim.  $\square$

*Proof of Example 2.3.* Any parametrization of  $g_k$  must be of the form  $\Phi_k := (A, c) \in \mathbb{R}^{2 \times 2} \times \mathbb{R}^{1 \times 2}$  with

$$A = \begin{bmatrix} a_1 & 0 \\ 0 & a_2 \end{bmatrix} \quad \text{or} \quad A = \begin{bmatrix} 0 & a_2 \\ a_1 & 0 \end{bmatrix} \quad (68)$$

(see Lemma A.3). Thus it holds that  $\|\Phi_k - \Gamma\|_\infty \geq \|(1, 0) - (0, a_2)\|_\infty \geq 1$  and the proof is completed by direct calculation.  $\square$

*Proof of Example 2.4.* Let  $\Phi_k$  be an arbitrary parametrization of  $g_k$  given by

$$\Phi_k = ([\tilde{a}_1 | \tilde{a}_2 | \dots | \tilde{a}_{2m}]^T, \tilde{c}) \in \mathcal{N}_{(d, 2m, 1)} \quad (69)$$

As  $g_k$  has two linear regions separated by the hyperplane with normal vector  $v$ , there exists  $j \in [2m]$  and  $\lambda \in \mathbb{R} \setminus \{0\}$  such that

$$\tilde{a}_j = \lambda v. \quad (70)$$

The distance of any weight vector  $\pm a_i$  of  $\Gamma$  to the line  $\{\lambda v : \lambda \in \mathbb{R}\}$  can be lower bounded by

$$\|\pm a_i - \lambda v\|_\infty^2 \geq \frac{1}{d} \|\pm a_i - \lambda v\|_2^2 \geq \frac{1}{d^2} [\|a_i\|_2^2 \|v\|_2^2 - \langle a_i, v \rangle^2], \quad i \in [m], \lambda \in \mathbb{R}. \quad (71)$$

The Cauchy-Schwarz inequality and the linear independence of  $v$  to each  $a_i$ ,  $i \in [m]$ , establishes that  $C := \frac{1}{d^2} \min_{i \in [m]} [\|a_i\|_2^2 \|v\|_2^2 - \langle a_i, v \rangle^2] > 0$ . Together with the fact that  $\mathcal{R}(\Gamma) = 0$ , this completes the proof.  $\square$

*Proof of Example 2.5.* Since  $x = \rho(x) - \rho(-x)$  for every  $x \in \mathbb{R}$ , the difference of the realizations is linear, i.e.

$$\mathcal{R}(\Theta_k) - \mathcal{R}(\Gamma_k) = \langle c_1^k a_1^k + c_2^k a_2^k + c_3^k a_3^k, x \rangle = \langle (0, 0, 3), x \rangle \quad (72)$$

and thus the difference of the gradients is constant, i.e.

$$|\mathcal{R}(\Theta_k) - \mathcal{R}(\Gamma_k)|_{W^{1,\infty}} = 3, \quad k \in \mathbb{N}. \quad (73)$$

However, regardless of the balancing and reordering of the weight vectors  $a_i^k$ ,  $i \in [3]$ , we have that

$$\|\Theta_k - \Gamma_k\|_\infty \geq k. \quad (74)$$

By Lemma A.3, up to balancing and reordering, there does not exist any other parametrization of  $\Theta_k$  with the same realization.  $\square$

### A.3 Section 3

#### A.3.1 Additional Material

**Lemma A.6.** *Let  $d, m, D \in \mathbb{N}$  and  $\Theta \in \mathcal{P}_{(d,m,D)}$ . Then there exists  $\Gamma \in \mathcal{N}_{(d+2,m+1,D)}^*$  such that for all  $x \in \mathbb{R}^d$  it holds that*

$$\mathcal{R}(\Gamma)(x_1, \dots, x_d, 1, -1) = \mathcal{R}(\Theta)(x). \quad (75)$$

*Proof.* Since  $\Theta \in \mathcal{P}_{(d,m,D)}$  it can be written as

$$\Theta = \left( (A, b), (c, e) \right) = \left( ([a_1 | \dots | a_m]^T, b), ([c_1 | \dots | c_m], e) \right) \quad (76)$$

with

$$\mathcal{R}(\Theta)(x) = \sum_{i=1}^m c_i \rho(\langle a_i, x \rangle + b_i) + e, \quad x \in \mathbb{R}^d, \quad (77)$$

where  $A \in \mathbb{R}^{m \times d}$ ,  $b \in \mathbb{R}^m$ ,  $C \in \mathbb{R}^{D \times m}$ , and  $e \in \mathbb{R}^D$ . We define for  $i \in [m]$

$$b_i^+ := \begin{cases} b_i + 1 & : b_i \geq 0 \\ 1 & : b_i < 0 \end{cases}, \quad \text{and} \quad b_i^- := \begin{cases} 1 & : b_i \geq 0 \\ -b_i + 1 & : b_i < 0 \end{cases} \quad (78)$$

and observe that  $b_i^+ > 0$ ,  $b_i^- > 0$ , and  $b_i^+ - b_i^- = b_i$ . For  $i \in [m]$  let

$$c_i^* := \begin{cases} c_i & : \|c_i\|_\infty \neq 0 \\ (1, \dots, 1) & : \|c_i\|_\infty = 0 \end{cases} \quad (79)$$

and

$$a_i^* := \begin{cases} (a_{i,1}, \dots, a_{i,d}, b_i^+, b_i^-) & : \|c_i\|_\infty \neq 0 \\ (0, \dots, 0, 1, 1) & : \|c_i\|_\infty = 0 \end{cases}. \quad (80)$$

Note that we have

$$\mathcal{R}(\Theta)(x) = \sum_{i=1}^m c_i^* \rho(\langle a_i^*, (x_1, \dots, x_d, 1, -1) \rangle) + e, \quad x \in \mathbb{R}^d. \quad (81)$$

To include the second bias  $e$  let

$$c_{m+1}^* := \begin{cases} e & : e \neq 0 \\ (1, \dots, 1) & : e = 0 \end{cases}, \quad \text{and} \quad a_{m+1}^* := \begin{cases} (0, \dots, 0, 2, 1) & : e \neq 0 \\ (0, \dots, 0, 1, 1) & : e = 0 \end{cases}. \quad (82)$$

In order to balance the network, let  $a_i^\Gamma = a_i^* (\frac{\|c_i^*\|_\infty}{\|a_i^*\|_\infty})^{1/2}$  and  $c_i^\Gamma = c_i^* (\frac{\|a_i^*\|_\infty}{\|c_i^*\|_\infty})^{1/2}$  for every  $i \in [m+1]$ . Then the claim follows by direct computation.  $\square$

#### A.3.2 Proofs

*Proof of Theorem 3.1.* Without loss of generality<sup>6</sup>, we can assume for all  $i \in [m]$  that  $a_i^\Theta = 0$  if and only if  $c_i^\Theta = 0$ . We now need to show that there always exists a way to reparametrize  $\mathcal{R}(\Theta)$  such that the architecture remains the same and (35) is satisfied. For simplicity of notation we will write  $r := |g - \mathcal{R}(\Gamma)|_{W^{1,\infty}}$  throughout the proof. Let  $f_i^\Gamma : \mathbb{R}^d \rightarrow \mathbb{R}$  resp.  $f_i^\Theta : \mathbb{R}^d \rightarrow \mathbb{R}$  be the part that is contributed by the  $i$ -th neuron, i.e.

$$\mathcal{R}(\Gamma) = \sum_{i=1}^m f_i^\Gamma \quad \text{with} \quad f_i^\Gamma(x) := c_i^\Gamma \rho(\langle a_i^\Gamma, x \rangle), \quad (83)$$

$$g = \mathcal{R}(\Theta) = \sum_{i=1}^m f_i^\Theta \quad \text{with} \quad f_i^\Theta(x) := c_i^\Theta \rho(\langle a_i^\Theta, x \rangle). \quad (84)$$

<sup>6</sup>In case one of them is zero, the other one can be set to zero without changing the realization.

Further let

$$\begin{aligned} H_{\Gamma,i}^+ &:= \{x \in \mathbb{R}^d : \langle a_i^\Gamma, x \rangle > 0\}, \\ H_{\Gamma,i}^0 &:= \{x \in \mathbb{R}^d : \langle a_i^\Gamma, x \rangle = 0\}, \\ H_{\Gamma,i}^- &:= \{x \in \mathbb{R}^d : \langle a_i^\Gamma, x \rangle < 0\}. \end{aligned} \quad (85)$$

By conditions C.2 and C.3a we have for all  $i, j \in I^\Gamma$  that

$$i \neq j \implies H_{\Gamma,i}^0 \neq H_{\Gamma,j}^0. \quad (86)$$

Further note that we can reparametrize  $\mathcal{R}(\Theta)$  such that the same holds there. To this end observe that

$$c\rho(\langle a, x \rangle) + c'\rho(\langle a', x \rangle) = (c + c' \frac{\|a'\|_\infty}{\|a\|_\infty})\rho(\langle a, x \rangle), \quad (87)$$

given that  $a'$  is a positive multiple of  $a$ . Specifically, let  $(J_k)_{k=1}^K$  be a partition of  $I^\Theta$  (i.e.  $J_k \neq \emptyset$ ,  $\cup_{k=1}^K J_k = I^\Theta$  and  $J_k \cap J_{k'} = \emptyset$  if  $k \neq k'$ ), such that for all  $k \in [K]$  it holds that

$$i, j \in J_k \implies \frac{a_j^\Theta}{\|a_j^\Theta\|_\infty} = \frac{a_i^\Theta}{\|a_i^\Theta\|_\infty}. \quad (88)$$

We denote by  $j_k$  the smallest element in  $J_k$  and make the following replacements, for all  $i \in I^\Theta$ , without changing the realization of  $\Theta$ :

$$a_i^\Theta \mapsto a_i^\Theta, c_i^\Theta \mapsto \sum_{j \in J_k} c_j^\Theta \frac{\|a_j^\Theta\|_\infty}{\|a_{j_k}^\Theta\|_\infty}, \quad \text{if } i \in J_k \text{ and } i = j_k, \quad (89)$$

$$a_i^\Theta \mapsto 0, c_i^\Theta \mapsto 0, \quad \text{if } i \in J_k \text{ and } i \neq j_k. \quad (90)$$

Note that we also update the set  $I^\Theta := \{i \in [m] : a_i^\Theta \neq 0\}$  accordingly. Let now

$$\begin{aligned} H_{\Theta,i}^+ &:= \{x \in \mathbb{R}^d : \langle a_i^\Theta, x \rangle > 0\}, \\ H_{\Theta,i}^0 &:= \{x \in \mathbb{R}^d : \langle a_i^\Theta, x \rangle = 0\}, \\ H_{\Theta,i}^- &:= \{x \in \mathbb{R}^d : \langle a_i^\Theta, x \rangle < 0\}. \end{aligned} \quad (91)$$

By construction and condition C.3a, we have for all  $i, j \in I^\Theta$  that

$$i \neq j \implies H_{\Theta,i}^0 \neq H_{\Theta,j}^0. \quad (92)$$

Note that we now have a parametrization  $\Theta$  of  $g$ , where all weight vectors  $a_i^\Theta$  are either zero (in which case the corresponding  $c_i^\Theta$  are also zero) or pairwise linearly independent to each other nonzero weight vector.

Next, for  $s \in \{0, 1\}^m$ , let

$$\begin{aligned} H_\Gamma^s &:= \bigcap_{i \in [m] : s_i=1} H_{\Gamma,i}^+ \cap \bigcap_{i \in [m] : s_i=0} H_{\Gamma,i}^-, \\ H_\Theta^s &:= \bigcap_{i \in [m] : s_i=1} H_{\Theta,i}^+ \cap \bigcap_{i \in [m] : s_i=0} H_{\Theta,i}^-, \end{aligned} \quad (93)$$

and

$$S^\Gamma := \{s \in \{0, 1\}^m : H_\Gamma^s \neq \emptyset\}, \quad S^\Theta := \{s \in \{0, 1\}^m : H_\Theta^s \neq \emptyset\}. \quad (94)$$

The  $H_\Gamma^s$ ,  $s \in S^\Gamma$ , and  $H_\Theta^s$ ,  $s \in S^\Theta$ , are the interiors of the different linear regions of  $\mathcal{R}(\Gamma)$  and  $\mathcal{R}(\Theta)$  respectively. Next observe that the derivatives of  $f_i^\Gamma, f_i^\Theta$  are (a.e.) given by

$$Df_i^\Gamma(x) = \mathbf{1}_{H_{\Gamma,i}^+}(x) c_i^\Gamma a_i^\Gamma, \quad Df_i^\Theta(x) = \mathbf{1}_{H_{\Theta,i}^+}(x) c_i^\Theta a_i^\Theta. \quad (95)$$

Note that for every  $x \in H_\Gamma^s, y \in H_\Theta^s$  we have

$$\begin{aligned} D\mathcal{R}(\Gamma)(x) &= \sum_{i \in [m]} Df_i^\Gamma(x) = \sum_{i \in [m]} s_i c_i^\Gamma a_i^\Gamma =: \Sigma_s^\Gamma, \\ D\mathcal{R}(\Theta)(y) &= \sum_{i \in [m]} Df_i^\Theta(y) = \sum_{i \in [m]} s_i c_i^\Theta a_i^\Theta =: \Sigma_s^\Theta. \end{aligned} \quad (96)$$

Next we use that for  $s \in S^\Gamma$ ,  $t \in S^\Theta$  we have  $|\Sigma_s^\Gamma - \Sigma_t^\Theta| \leq r$  if  $H_s^\Gamma \cap H_t^\Theta \neq \emptyset$ , and compare adjacent linear regions of  $\mathcal{R}(\Gamma) - \mathcal{R}(\Theta)$ . Let now  $i \in I^\Gamma$  and consider the following cases:

**Case 1:** We have  $H_{\Gamma,i}^0 \neq H_{\Theta,j}^0$  for all  $j \in I^\Theta$ . This means that the  $Df_k^\Theta$ ,  $k \in [m]$ , and the  $Df_k^\Gamma$ ,  $k \in [m] \setminus \{i\}$ , are the same on both sides near the hyperplane  $H_{\Gamma,i}^0$ , while the value of  $Df_i^\Gamma$  is 0 on one side and  $c_i^\Gamma a_i^\Gamma$  on the other. Specifically, there exist  $s^+, s^- \in S^\Gamma$  and  $s^* \in S^\Theta$  such that  $s_i^+ = 1$ ,  $s_i^- = 0$ ,  $s_j^+ = s_j^-$  for all  $j \in [m] \setminus \{i\}$ , and  $H_{\Gamma^+}^{s^+} \cap H_{\Theta^*}^{s^*} \neq \emptyset$ ,  $H_{\Gamma^-}^{s^-} \cap H_{\Theta^*}^{s^*} \neq \emptyset$ , which implies

$$\|c_i^\Gamma a_i^\Gamma\|_\infty = \|(\Sigma_{s^+}^\Gamma - \Sigma_{s^*}^\Theta) - (\Sigma_{s^-}^\Gamma - \Sigma_{s^*}^\Theta)\|_\infty \leq 2r. \quad (97)$$

**Case 2:** There exists  $j \in I^\Theta$  such that  $H_{\Gamma,i}^0 = H_{\Theta,j}^0$ . Note that (86) ensures that  $H_{\Gamma,i}^0 \neq H_{\Gamma,k}^0$  for  $k \in [m] \setminus \{i\}$  and (92) ensures that  $H_{\Theta,j}^0 \neq H_{\Theta,k}^0$  for  $k \in [m] \setminus \{j\}$ . Moreover, Condition C.3b implies  $H_{\Gamma,i}^+ = H_{\Theta,j}^+$ . This means that the  $Df_k^\Theta$ ,  $k \in [m] \setminus \{j\}$ , and the  $Df_k^\Gamma$ ,  $k \in [m] \setminus \{i\}$ , are the same on both sides near the hyperplane  $H_{\Gamma,i}^0 = H_{\Theta,j}^0$ , while the values of  $Df_i^\Gamma$  and  $Df_j^\Theta$  change. Specifically there exist  $s^+, s^- \in S^\Gamma$  and  $t^+, t^- \in S^\Theta$  such that  $s_i^+ = 1$ ,  $s_i^- = 0$ ,  $s_k^+ = s_k^-$  for all  $k \in [m] \setminus \{i\}$ ,  $t_j^+ = 1$ ,  $t_j^- = 0$ ,  $t_k^+ = t_k^-$  for all  $k \in [m] \setminus \{j\}$  and  $H_{\Gamma^+}^{s^+} \cap H_{t^+}^\Theta \neq \emptyset$ ,  $H_{\Gamma^-}^{s^-} \cap H_{t^-}^\Theta \neq \emptyset$ , which implies

$$\|c_i^\Gamma a_i^\Gamma - c_j^\Theta a_j^\Theta\|_\infty = \|(\Sigma_{s^+}^\Gamma - \Sigma_{t^+}^\Theta) - (\Sigma_{s^-}^\Gamma - \Sigma_{t^-}^\Theta)\|_\infty \leq 2r. \quad (98)$$

Analogously we get for  $i \in I^\Theta$  that  $H_{\Theta,i}^0 \neq H_{\Gamma,j}^0$  for all  $j \in I^\Gamma$  implies  $\|c_i^\Theta a_i^\Theta\|_\infty \leq 2r$ . Next let

$$I_1 := \{i \in [m] : H_{\Gamma,i}^0 \neq H_{\Theta,j}^0 \text{ for all } j \in I^\Theta\} \cup \{i \in [m] : a_i^\Gamma = 0\} \quad (99)$$

and

$$I_2 := [m] \setminus I_1 = \{i \in [m] : \exists j \in I^\Theta \text{ such that } H_{\Gamma,i}^+ = H_{\Theta,j}^+\}. \quad (100)$$

Colloquially speaking, this shows that for every  $f_i^\Gamma$  with  $i \in I_2$  there is a  $f_j^\Theta$  with exactly matching half-spaces, i.e.  $H_{\Gamma,i}^+ = H_{\Theta,j}^+$ , and approximately matching gradients (Case 2). Moreover, all unmatched  $f_i^\Gamma$  and  $f_j^\Theta$  must have a small gradient (Case 1).

Specifically, the above establishes that there exists a permutation  $\pi : [m] \rightarrow [m]$  such that for every  $i \in I_1$  it holds that

$$\|c_i^\Gamma a_i^\Gamma\|_\infty, \|c_{\pi(i)}^\Theta a_{\pi(i)}^\Theta\|_\infty \leq 2r, \quad (101)$$

and for every  $i \in I_2$  that

$$\|c_i^\Gamma a_i^\Gamma - c_{\pi(i)}^\Theta a_{\pi(i)}^\Theta\|_\infty \leq 2r. \quad (102)$$

We make the following replacements, for all  $i \in [m]$ , without changing the realization of  $\Theta$ :

$$a_i^\Theta \rightarrow a_{\pi(i)}^\Theta, \quad c_i^\Theta \rightarrow c_{\pi(i)}^\Theta. \quad (103)$$

In order to balance the weights of  $\Theta$  for  $I_1$ , we further make the following replacements, for all  $i \in I_1$  with  $a_i^\Theta \neq 0$ , without changing the realization of  $\Theta$ :

$$a_i^\Theta \rightarrow \left(\frac{|c_i^\Theta|}{\|a_i^\Theta\|_\infty}\right)^{1/2} a_i^\Theta, \quad c_i^\Theta \rightarrow \left(\frac{\|a_i^\Theta\|_\infty}{|c_i^\Theta|}\right)^{1/2} c_i^\Theta. \quad (104)$$

This implies for every  $i \in I_1$  that

$$|c_i^\Theta|, \|a_i^\Theta\|_\infty \leq (2r)^{1/2}. \quad (105)$$

Moreover, due to Condition C.1, we get for every  $i \in I_1$  that

$$|c_i^\Gamma|, \|a_i^\Gamma\|_\infty \leq \beta. \quad (106)$$

Thus we get for every  $i \in I_1$  that

$$|c_i^\Theta - c_i^\Gamma|, \|a_i^\Theta - a_i^\Gamma\|_\infty \leq \beta + (2r)^{1/2}. \quad (107)$$

Next we (approximately) match the balancing of  $(c_i^\Theta, a_i^\Theta)$  to the balancing of  $(c_i^\Gamma, a_i^\Gamma)$  for  $i \in I_2$ , in order to derive estimates on  $|c_i^\Theta - c_i^\Gamma|$  and  $\|a_i^\Theta - a_i^\Gamma\|_\infty$  from (102). Specifically, we make the following replacements, for all  $i \in I_2$ , without changing the realization of  $\Theta$ :

$$a_i^\Theta \rightarrow \left(\frac{|c_i^\Theta|}{\|a_i^\Theta\|_\infty}\right)^{1/2} a_i^\Theta, \quad c_i^\Theta \rightarrow \left(\frac{\|a_i^\Theta\|_\infty}{|c_i^\Theta|}\right)^{1/2} c_i^\Theta, \quad \text{if } \|c_i^\Gamma a_i^\Gamma\|_\infty \leq 2r, \quad (108)$$

$$a_i^\Theta \rightarrow \frac{c_i^\Theta}{c_i^\Gamma} a_i^\Theta, \quad c_i^\Theta \rightarrow c_i^\Gamma, \quad \text{if } \|c_i^\Gamma a_i^\Gamma\|_\infty > 2r, |c_i^\Gamma| > \|a_i^\Gamma\|_\infty, \quad (109)$$

$$a_i^\Theta \rightarrow a_i^\Gamma, \quad c_i^\Theta \rightarrow \frac{\|a_i^\Theta\|_\infty}{\|a_i^\Gamma\|_\infty} c_i^\Theta, \quad \text{if } \|c_i^\Gamma a_i^\Gamma\|_\infty > 2r, |c_i^\Gamma| < \|a_i^\Gamma\|_\infty, \quad (110)$$

$$a_i^\Theta \rightarrow \left(\frac{|c_i^\Theta|}{\|a_i^\Theta\|_\infty}\right)^{1/2} a_i^\Theta, \quad c_i^\Theta \rightarrow \left(\frac{\|a_i^\Theta\|_\infty}{|c_i^\Theta|}\right)^{1/2} c_i^\Theta, \quad \text{if } \|c_i^\Gamma a_i^\Gamma\|_\infty > 2r, |c_i^\Gamma| = \|a_i^\Gamma\|_\infty. \quad (111)$$

Let now  $i \in I_2$  and consider the following cases:

**Case A:** We have  $\|c_i^\Gamma a_i^\Gamma\|_\infty \leq 2r$  which, together with (102), implies  $\|c_i^\Theta a_i^\Theta\|_\infty \leq 4r$ . Due to (108) and Condition C.1 it follows that

$$|c_i^\Theta - c_i^\Gamma|, \|a_i^\Theta - a_i^\Gamma\|_\infty \leq \beta + 2r^{1/2}. \quad (112)$$

**Case B.1:** We have  $\|c_i^\Gamma a_i^\Gamma\|_\infty > 2r$  and  $|c_i^\Gamma| > \|a_i^\Gamma\|_\infty$  which ensures  $|c_i^\Gamma| > \|c_i^\Gamma a_i^\Gamma\|_\infty^{1/2}$ . Due to (109) we get  $c_i^\Theta = c_i^\Gamma$  and it follows that

$$\|a_i^\Theta - a_i^\Gamma\|_\infty = \frac{1}{|c_i^\Gamma|} \|c_i^\Theta a_i^\Theta - c_i^\Gamma a_i^\Gamma\|_\infty \leq \frac{2r}{\|c_i^\Gamma a_i^\Gamma\|_\infty^{1/2}} \leq (2r)^{1/2}. \quad (113)$$

**Case B.2:** We have  $\|c_i^\Gamma a_i^\Gamma\|_\infty > 2r$  and  $|c_i^\Gamma| < \|a_i^\Gamma\|_\infty$  which ensures  $\|a_i^\Gamma\| > \|c_i^\Gamma a_i^\Gamma\|_\infty^{1/2}$ . Due to (110) we get  $a_i^\Theta = a_i^\Gamma$  and it follows that

$$|c_i^\Theta - c_i^\Gamma| = \frac{1}{\|a_i^\Gamma\|_\infty} \|c_i^\Theta a_i^\Theta - c_i^\Gamma a_i^\Gamma\|_\infty \leq \frac{2r}{\|c_i^\Gamma a_i^\Gamma\|_\infty^{1/2}} \leq (2r)^{1/2}. \quad (114)$$

**Case B.3:** We have  $\|c_i^\Gamma a_i^\Gamma\|_\infty > 2r$  and  $|c_i^\Gamma| = \|a_i^\Gamma\|_\infty$ . Note that  $\|c_i^\Gamma a_i^\Gamma\|_\infty > 2r$  and (102) ensure that  $\text{sgn}(c_i^\Theta) = \text{sgn}(c_i^\Gamma)$ , and that for  $x, y > 0$  it holds that  $|x - y| \leq |x^2 - y^2|^{1/2}$ . Combining this with the definition of  $I_2$ , the reverse triangle inequality, and (111) implies that

$$\|a_i^\Theta - a_i^\Gamma\|_\infty \leq (2r)^{1/2} \quad \text{and} \quad |c_i^\Theta - c_i^\Gamma| \leq (2r)^{1/2}. \quad (115)$$

Combining (107), (112), (113), (114), and (115) establishes that

$$\|\Theta - \Gamma\|_\infty \leq \beta + 2r^{\frac{1}{2}}, \quad (116)$$

which completes the proof.  $\square$

*Proof of Theorem 3.3.* Let  $\Theta \in \mathcal{N}_N^*$  be a parametrization of  $g$ , i.e.  $\mathcal{R}(\Theta) = g$ . We write

$$\Gamma = \left( \begin{bmatrix} a_1^\Gamma \\ \vdots \\ a_m^\Gamma \end{bmatrix}, [c_1^\Gamma \dots c_m^\Gamma] \right), \quad \Theta = \left( \begin{bmatrix} a_1^\Theta \\ \vdots \\ a_m^\Theta \end{bmatrix}, [c_1^\Theta \dots c_m^\Theta] \right) \in \mathcal{N}_{(d,m,D)}^* \quad (117)$$

and  $r := |g - \mathcal{R}(\Gamma)|_{W^{1,\infty}}$ . For convenience of notation we consider the weight vectors  $a_i^\Gamma, a_i^\Theta$  here as row vectors in order to write the derivatives of the ridge functions as  $c_i^\Gamma a_i^\Gamma, c_i^\Theta a_i^\Theta \in \mathbb{R}^{D \times d}$  without transposing.

We will now adjust the approach used in the proof of Theorem 3.1 to work for multi-dimensional outputs in the case of balanced networks. By definition of  $\mathcal{N}_N^*$ , the  $(a_i^\Theta)_{i=1}^m$  are pairwise linearly independent and we can skip the first reparametrization step in (89) and (90).

The following ‘‘hyperplane-jumping’’ argument, which was used to get the estimates (97) and (98), works analogously since Conditions C.2 and C.3 are fulfilled by definition of  $\mathcal{N}_N^*$ . This establishes the existence of a permutation  $\pi: [m] \rightarrow [m]$  and sets  $I_1, I_2 \subseteq [m]$ , as defined as in (99) and (100), such that for every  $i \in I_1$  it holds that

$$\|c_i^\Gamma a_i^\Gamma\|_\infty, \|c_{\pi(i)}^\Theta a_{\pi(i)}^\Theta\|_\infty \leq 2r, \quad (118)$$

and for every  $i \in I_2$  that

$$\|c_i^\Gamma a_i^\Gamma - c_{\pi(i)}^\Theta a_{\pi(i)}^\Theta\|_\infty \leq 2r. \quad (119)$$

As in (103), we make the following replacements, for all  $i \in [m]$ , without changing the realization of  $\Theta$ :

$$a_i^\Theta \rightarrow a_{\pi(i)}^\Theta, \quad c_i^\Theta \rightarrow c_{\pi(i)}^\Theta. \quad (120)$$

Note that the weights of  $\Theta$  are already balanced, i.e. we have for every  $i \in [m]$  that

$$\|c_i^\Theta\|_\infty = \|a_i^\Theta\|_\infty = \|c_i^\Theta\|_\infty^{1/2} \|a_i^\Theta\|_\infty^{1/2} = \|c_i^\Theta a_i^\Theta\|_\infty^{1/2}. \quad (121)$$

Thus, we can skip the reparametrization step in (104) and get directly for every  $i \in I_1$  that

$$\|c_i^\Theta - c_i^\Gamma\|_\infty \leq \|c_i^\Theta\|_\infty + \|c_i^\Gamma\|_\infty = \|c_i^\Theta a_i^\Theta\|_\infty^{1/2} + \|c_i^\Gamma a_i^\Gamma\|_\infty^{1/2} \leq 2(2r)^{1/2} \quad (122)$$

and analogously  $\|a_i^\Theta - a_i^\Gamma\|_\infty \leq 2(2r)^{1/2}$ .

For  $i \in I_2$  we need to slightly deviate from the proof of Theorem 3.1. We can skip the reparametrization step in (108)-(111) due to balancedness and need to distinguish three cases:

**Case A.1:** We have  $\|c_i^\Gamma a_i^\Gamma\|_\infty \leq 2r$  which, together with (119), implies  $\|c_i^\Theta a_i^\Theta\|_\infty \leq 4r$ . Due to balancedness it follows that

$$\|c_i^\Theta - c_i^\Gamma\|_\infty, \|a_i^\Theta - a_i^\Gamma\|_\infty \leq 4r^{1/2}. \quad (123)$$

**Case A.2:** We have  $\|c_i^\Theta a_i^\Theta\|_\infty \leq 2r$  which, together with (119), implies  $\|c_i^\Gamma a_i^\Gamma\|_\infty \leq 4r$ . Again it follows that

$$\|c_i^\Theta - c_i^\Gamma\|_\infty, \|a_i^\Theta - a_i^\Gamma\|_\infty \leq 4r^{1/2}. \quad (124)$$

**Case B:** We have  $\|c_i^\Theta a_i^\Theta\|_\infty > 2r$  and  $\|c_i^\Gamma a_i^\Gamma\|_\infty > 2r$ . Due to the definition of  $I_2$  there exists  $e_i \in \mathbb{R}^d$ ,  $\lambda_i^\Gamma, \lambda_i^\Theta \in (0, \infty)$  with  $\|e_i\|_\infty = 1$ ,  $a_i^\Theta = \lambda_i^\Theta e_i$ , and  $a_i^\Gamma = \lambda_i^\Gamma e_i$ . As in (115) we obtain that

$$\begin{aligned} \|a_i^\Theta - a_i^\Gamma\|_\infty &= \|e_i\|_\infty |\lambda_i^\Theta - \lambda_i^\Gamma| \leq |(\lambda_i^\Theta)^2 - (\lambda_i^\Gamma)^2|^{1/2} \\ &= \| \|c_i^\Theta\|_\infty \|a_i^\Theta\|_\infty - \|c_i^\Gamma\|_\infty \|a_i^\Gamma\|_\infty \|^{1/2} \\ &\leq \|c_i^\Theta a_i^\Theta - c_i^\Gamma a_i^\Gamma\|_\infty^{1/2} \leq (2r)^{1/2}. \end{aligned} \quad (125)$$

Let now w.l.o.g.  $\|a_i^\Gamma\|_\infty \geq \|a_i^\Theta\|_\infty$  (otherwise we switch their roles in the following) which implies that  $\lambda_i^\Gamma = \Delta_i + \lambda_i^\Theta$  with  $\Delta_i = \lambda_i^\Gamma - \lambda_i^\Theta \geq 0$ . Then it holds that

$$\begin{aligned} \|c_i^\Theta - c_i^\Gamma\|_\infty &= \frac{\|c_i^\Theta a_i^\Gamma - c_i^\Gamma a_i^\Gamma\|_\infty}{\|a_i^\Gamma\|_\infty} \leq \frac{\|c_i^\Theta a_i^\Gamma - c_i^\Theta a_i^\Theta\|_\infty + \|c_i^\Theta a_i^\Theta - c_i^\Gamma a_i^\Gamma\|_\infty}{\|a_i^\Gamma\|_\infty} \\ &\leq \frac{\|c_i^\Theta\|_\infty |\lambda_i^\Gamma - \lambda_i^\Theta| + 2r}{\lambda_i^\Gamma} = \frac{\lambda_i^\Theta \Delta_i + 2r}{\Delta_i + \lambda_i^\Theta} \\ &= \frac{(2r)^{1/2} (\Delta_i + \lambda_i^\Theta) - (\lambda_i^\Theta - (2r)^{1/2}) ((2r)^{1/2} - \Delta_i)}{\Delta_i + \lambda_i^\Theta} \leq (2r)^{1/2}. \end{aligned} \quad (126)$$

The last step holds due to (125) and the balancedness of  $\Theta$  which ensure that

$$\lambda_i^\Theta = \|c_i^\Theta a_i^\Theta\|_\infty^{1/2} > (2r)^{1/2} \geq |\lambda_i^\Theta - \lambda_i^\Gamma| = \Delta_i. \quad (127)$$

This completes the proof.  $\square$

## A.4 Section 4

### A.4.1 Additional Material

**Lemma A.7** (Inverse stability for fixed weight vectors). *Let  $N = (d, m, D) \in \mathbb{N}^3$ , let  $A = [a_1 | \dots | a_m]^T \in \mathbb{R}^{m \times d}$  with*

$$\frac{a_i}{\|a_i\|_\infty} \neq \frac{a_j}{\|a_j\|_\infty} \quad \text{and} \quad (a_i)_{d-1}, (a_i)_d > 0 \quad (128)$$

for all  $i \in [m], j \in [m] \setminus \{i\}$ , and define

$$\mathcal{N}_N^A := \left\{ \Gamma \in \mathcal{N}_N : a_i^\Gamma = \lambda_i a_i \text{ with } \lambda_i \in (0, \infty) \text{ and } \|c_i^\Gamma\|_\infty = \|a_i^\Gamma\|_\infty \text{ for all } i \in [m] \right\}. \quad (129)$$

Then for every  $B \in (0, \infty)$  there is  $C_B \in (0, \infty)$  such that we have uniform  $(C_B, 1/2)$  inverse stability w.r.t.  $\|\cdot\|_{L^\infty((-B, B)^d)}$ . That is, for all  $\Gamma \in \mathcal{N}_N^A$  and  $g \in \mathcal{R}(\mathcal{N}_N^A)$  there exists a parametrization  $\Phi \in \mathcal{N}_N^A$  with

$$\mathcal{R}(\Phi) = g \quad \text{and} \quad \|\Phi - \Gamma\|_\infty \leq C_B \|g - \mathcal{R}(\Gamma)\|_{L^\infty((-B, B)^d)}^{\frac{1}{2}}. \quad (130)$$

*Proof.* Note that the non-zero angle between the hyperplanes given by the weight vectors  $(a_i)_{i=1}^m$  establishes that the minimal perimeter inside each linear region intersected with  $(-B, B)^d$  is lower bounded. As the realization is linear on each region, this implies the existence of a constant  $C'_B \in (0, \infty)$ , such that for every  $\Theta \in \mathcal{N}_N^A$  it holds that

$$|\mathcal{R}(\Theta)|_{W^{1,\infty}} \leq C'_B \|\mathcal{R}(\Theta)\|_{L^\infty((-B, B)^d)}. \quad (131)$$

Now note that for  $\mathcal{N}_N^A$  we can get the same uniform  $(4, 1/2)$  inverse stability result w.r.t.  $|\cdot|_{W^{1,\infty}}$  as in Theorem 3.3 by choosing  $\pi$  to be the identity in (118). Together with (131) this implies the claim.  $\square$
